# Supplementary material for: Self-assembled manganese acetate@tin dioxide colloidal quantum dots as an electron-transport layer for efficient and stable perovskite solar cells
Source: Royal Society of Chemistry journal article supplement (doi:10.1039/d4qi00166d), 2024-01-01
Supplement: d4qi00166d1.pdf [file d4qi00166d1.pdf]

**Supporting information for:**

**Self-assembled manganese acetate@tin dioxide colloidal quantum dots as electron transport layer for efficient and stable perovskite solar cells**

Yutao Li<sup>1</sup>, Chenyu Zhao<sup>1</sup>, Lexin Wang<sup>1</sup>, Lin Fan<sup>1, 2</sup>, Maobin Wei<sup>1, 2</sup>, Huilian Liu<sup>1, 2</sup>,  
Xiaoyan Liu<sup>1, 2</sup>, Jinghai Yang<sup>1, 2\*</sup>, Fengyou Wang<sup>1, 2\*</sup>, Lili Yang<sup>1, 2\*</sup>

1. Key Laboratory of Functional Materials Physics and Chemistry of the Ministry of Education, Jilin Normal University, Changchun 130103, China
2. National Demonstration Center for Experimental Physics Education, Jilin Normal University, Siping 136000, China

## ***Experimental section & Materials***

### ***Supplementary note 1***

**Materials:** Mn(Ac)<sub>2</sub> was purchased from Aladdin. Lead iodide (PbI<sub>2</sub>), formamidinium iodide (FAI), lead bromide (PbBr<sub>2</sub>), Cesium iodide (CsI), Methylammonium chloride (MACl), methylammonium bromide (MABr), 4-tert-butylpyridine and lithium bis (trifluoromethanesulfonyl) imide (Li-TFSI), tris(2-(1H-pyrazol-1-yl)-4-tertbutylpyridine)-cobalt(III)tris(bis(trifluoromethylsulfonyl)imide) (FK209), tert-butylpyridine (TBP), SnO<sub>2</sub> aqueous colloidal dispersion (15wt%), 2,2',7,7'-tetrakis (N,N-dip-methoxyphenylamine) and 9,9'-Spirobifluorene (Spiro-OMeTAD) were purchased from Xi'an Yuri Solar Co., Ltd. Indium Tin Oxides (ITO) glass substrates, Dimethyl sulfoxide (DMSO) and N,N-Dimethylformamide (DMF) were purchased from YOUXUAN Technology Co. Ltd. (China). Chlorobenzene (CB) were purchased from Beijing InnoChem Science & Technology Co., Ltd. All chemicals and reagents were used as received from chemical companies without any further purification.

## ***Supplementary note 2***

***Characterization:*** The scanning electron microscope (SEM) images was taken using a Hitachi S-4800. AFM was measured by Park NX20, Korea. The transmission electron microscopy (TEM) images was taken using JEOL 2100F. The optical properties of the films were analyzed using a UV-Vis spectrophotometer (Shimadzu, UV-3600Plus, Japan). Fourier transform infrared spectroscopy (FTIR) was measured by Nicolet iS10, America. The scanning electron microscope (SEM) images was taken using a Hitachi S-4800. AFM was measured by Park NX20, Korea. The crystal structure of the SnO<sub>2</sub> and the perovskite samples were carried out by X-ray diffraction (XRD) (PANalytical X-ray Spectrometer Empyrean DY01660 ID206161). PL spectra were obtained using a PL microscopic spectrometer (FLS1000, China) with a 405 nm CW laser excitation source. The TRPL (FLS1000, China) was measured by using an excitation wavelength of 405nm. The main corresponding setup consisted of perovskite, and mica-flakes. The transient photovoltage spectrum (TPV) was measured by CEL-TPV2000 (CEAULIGHT, China). X-ray photoelectron spectroscopy (XPS) was used to obtain the chemical states information (measured by Escalab250Xi, Germany). *J-V* characterizations was carried out under AM 1.5 G simulated sunlight illuminations (100 mW cm<sup>-2</sup>, Model 94043A, Oriel, American). Electrical impedance spectroscopy (EIS) was performed by using the electrochemical workstation (CHI660C, Chen Hua, China) with a frequency range from 1 Hz to 0.1MHz in the dark. The spectral responses were obtained from an EQE measurement system (Newport PV measurement, American).

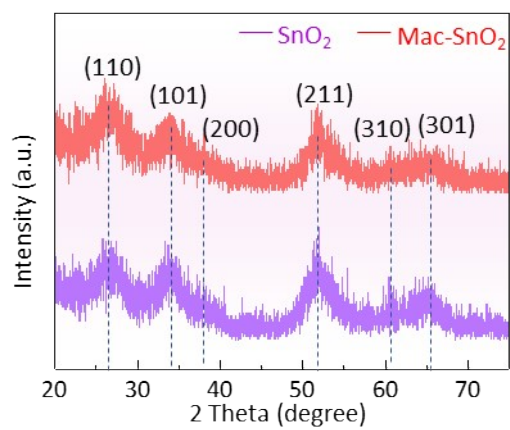

**Fig. S1.** XRD patterns of SnO<sub>2</sub> and Mac-SnO<sub>2</sub> films on glass substrates.

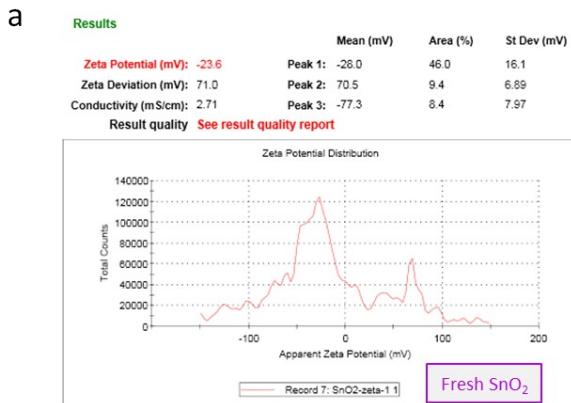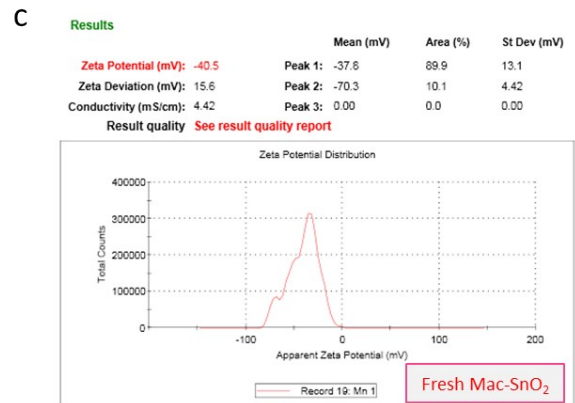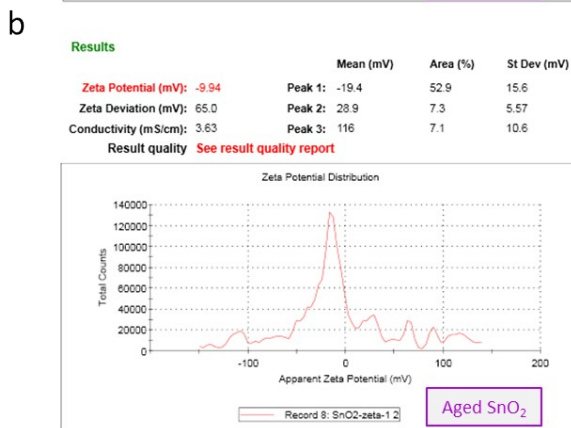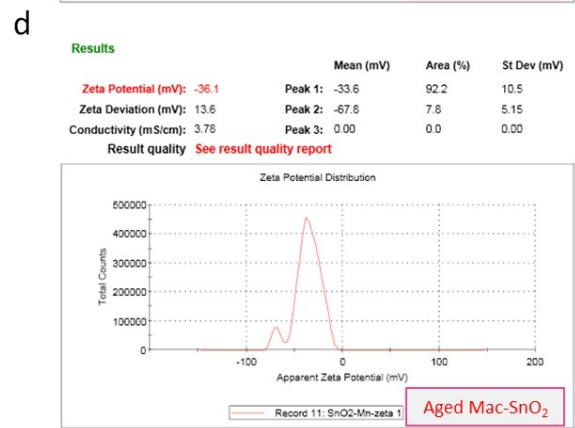

**Fig. S2.** Surface zeta potential of fresh (a) SnO<sub>2</sub> and (b) Mac-SnO<sub>2</sub> solutions. Surface zeta potential of 72 hours aged (c) SnO<sub>2</sub> and (d) Mac-SnO<sub>2</sub> solutions.

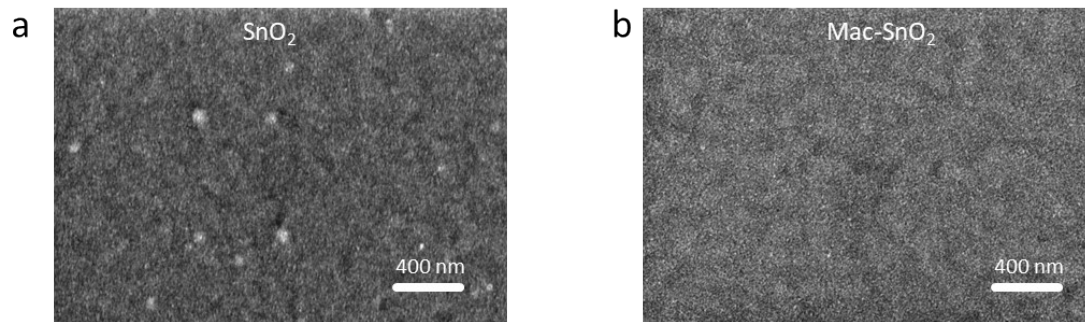

**Fig. S3.** The SEM images of (a) SnO<sub>2</sub> and (b) Mac-SnO<sub>2</sub> films.

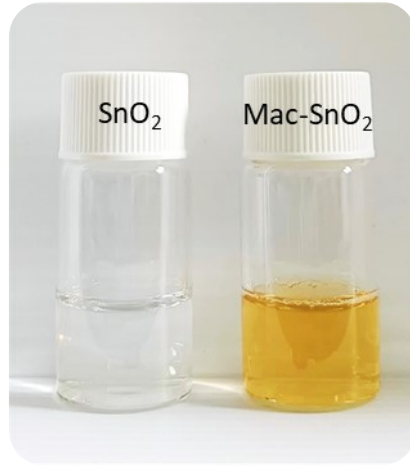

**Fig. S4.** Photograph of the SnO<sub>2</sub> and Mac-SnO<sub>2</sub> solutions.

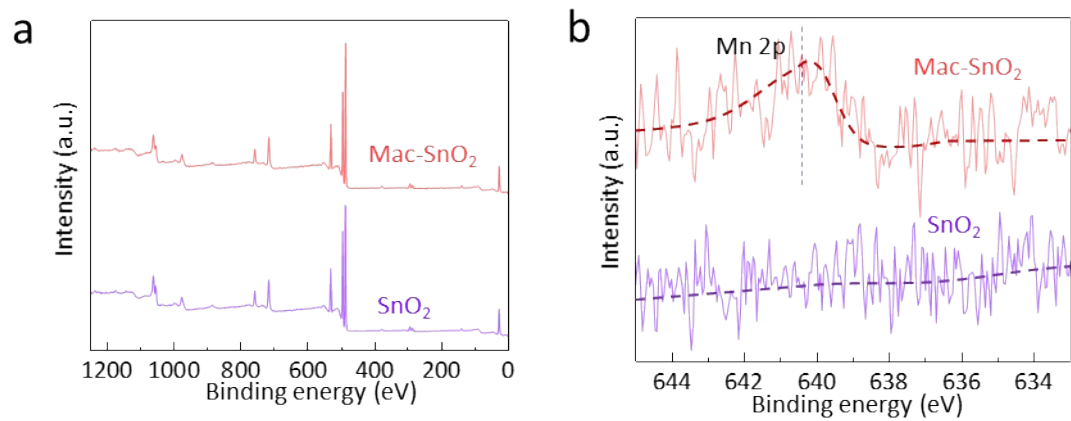

**Fig. S5.** XPS results of the SnO<sub>2</sub> and Mac-SnO<sub>2</sub>. (a) full spectra; (b) the amplified spectra of Mn 2p signals.



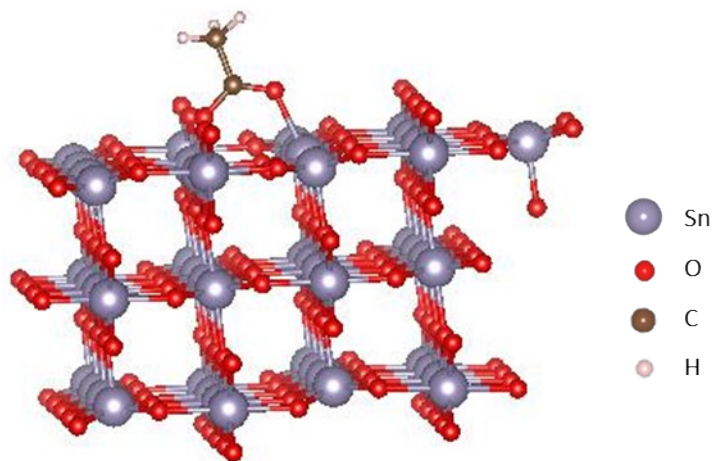

**Fig. S6.** Side view of the optimized  $\text{SnO}_2\text{-O}_v/\text{Ac}^-$ .

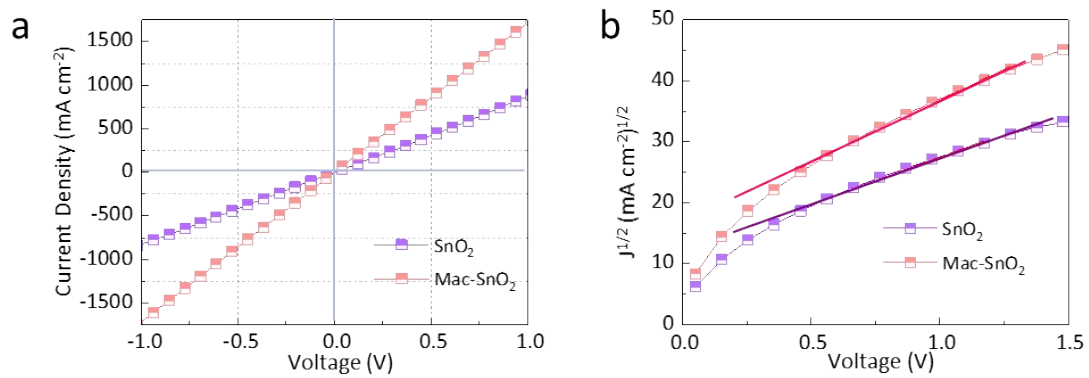

**Fig. S7.** The (a) conductivity and (b) electronic mobility of SnO<sub>2</sub> and Mac-SnO<sub>2</sub> films.

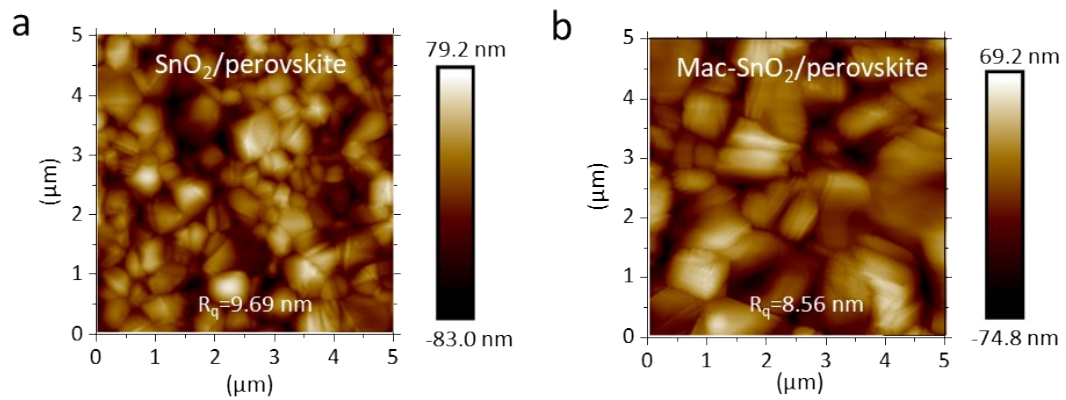

**Fig. S8.** AFM images of  $\text{SnO}_2/\text{perovskite}$  and  $\text{Mac-SnO}_2/\text{perovskite}$  films.

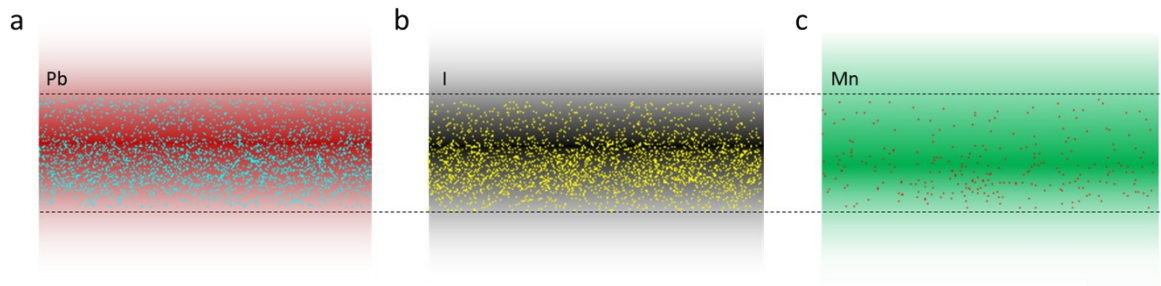

**Fig. S9.** The SEM element mapping analysis of (a) Pb, (b) I, and (c) Mn of the Mac-SnO<sub>2</sub>/perovskite films.

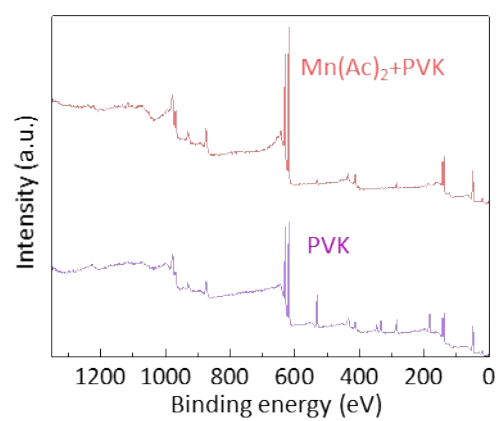

**Fig. S10.** XPS full spectra of the perovskite and Mn(Ac)<sub>2</sub>+perovskite.

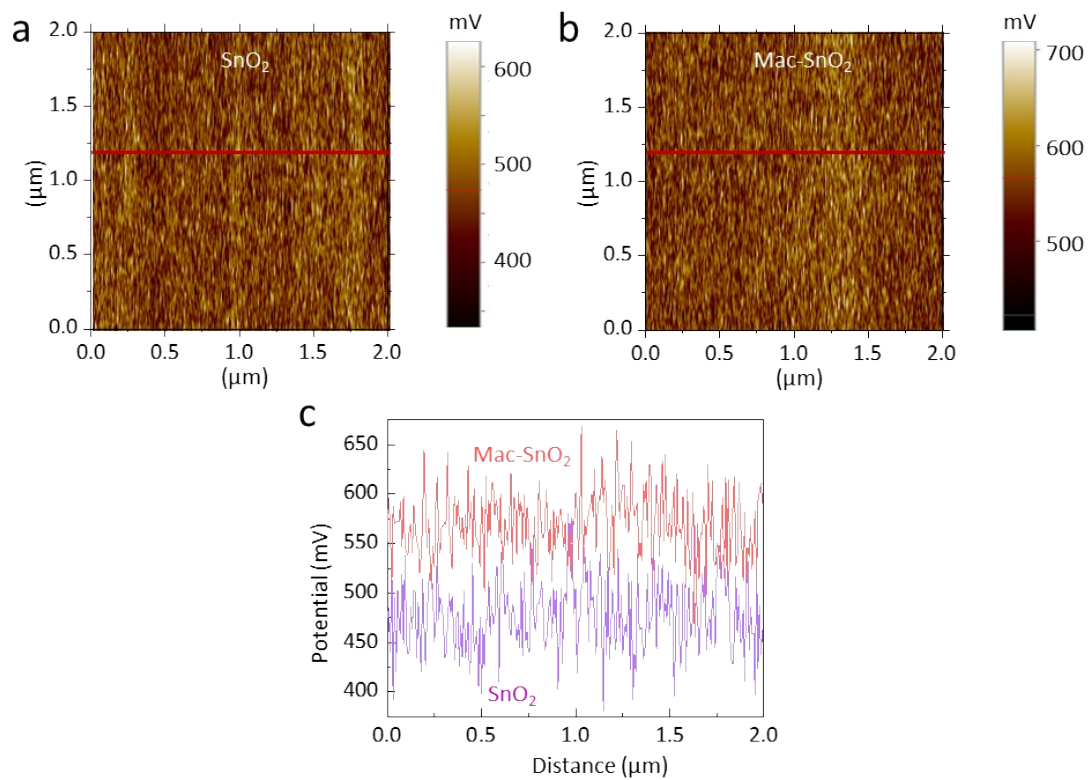

**Fig. S11.** KPFM images of (a) SnO<sub>2</sub> and (b) Mac-SnO<sub>2</sub> films. (c) Surface potential data of SnO<sub>2</sub> and Mac-SnO<sub>2</sub> films extracted from KPFM.

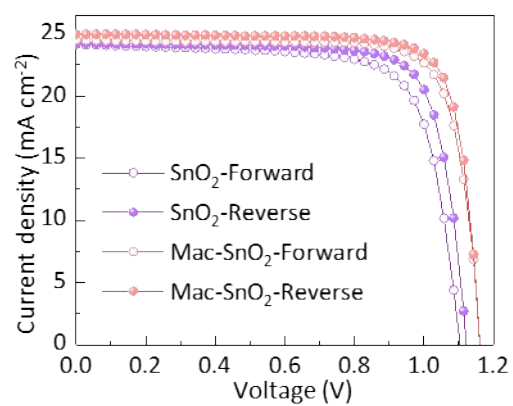

**Fig. S12.**  $J$ - $V$  curves of the SnO<sub>2</sub> and Mac-SnO<sub>2</sub> based PSCs at forward and reverse scans.

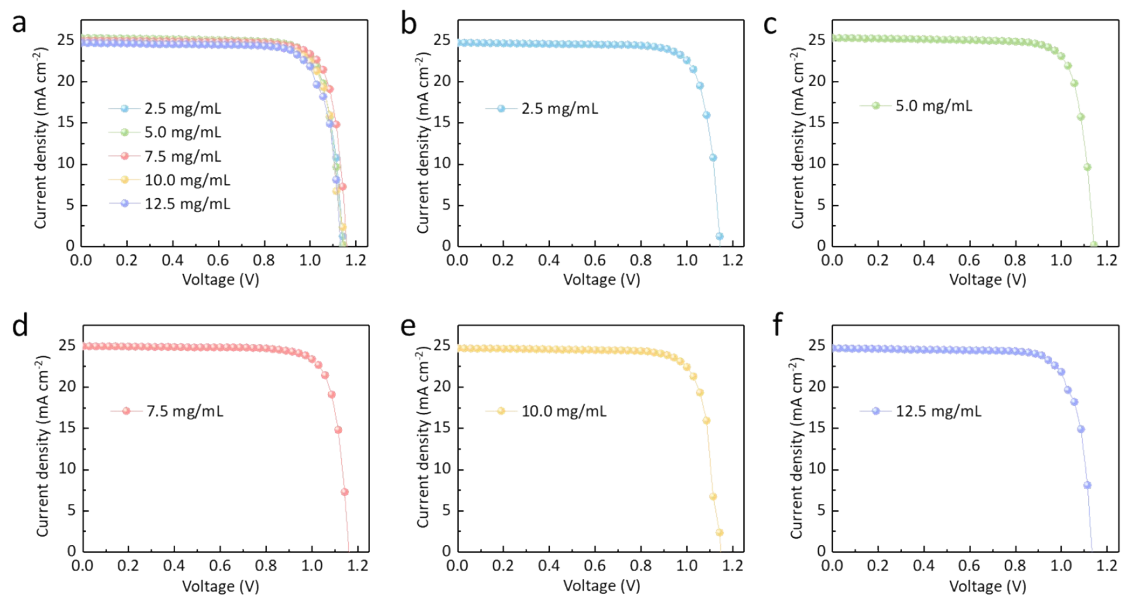

**Fig. S13.**  $J$ - $V$  curves in reverse scan of the PSCs based on different Mac- $\text{SnO}_2$  concentrations.



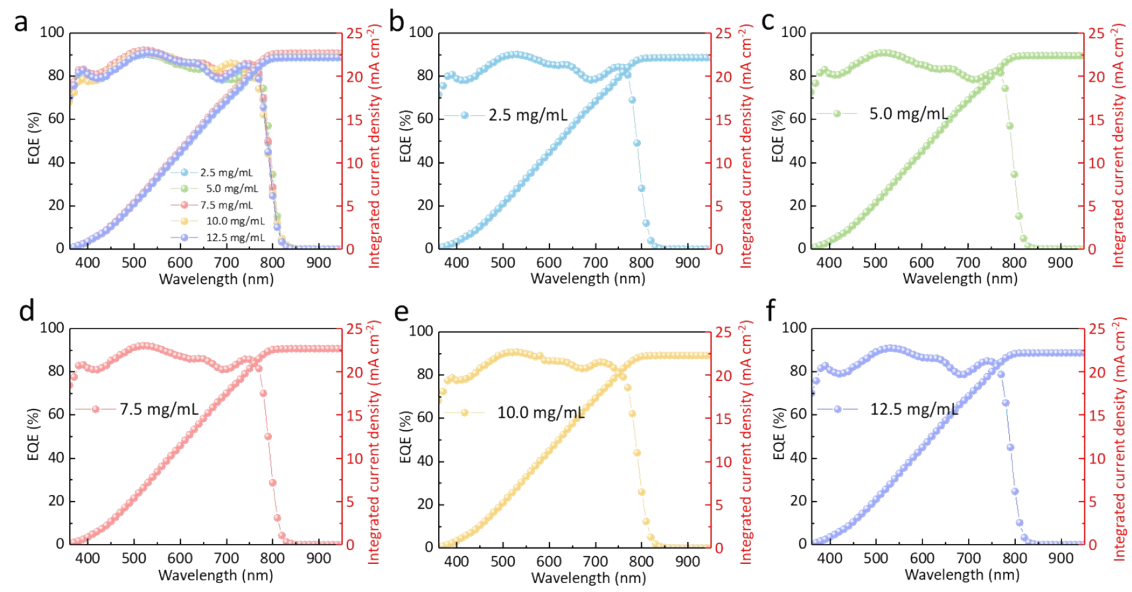

**Fig. S14.** EQE spectra of the PSCs based on different Mac-SnO<sub>2</sub> concentrations.

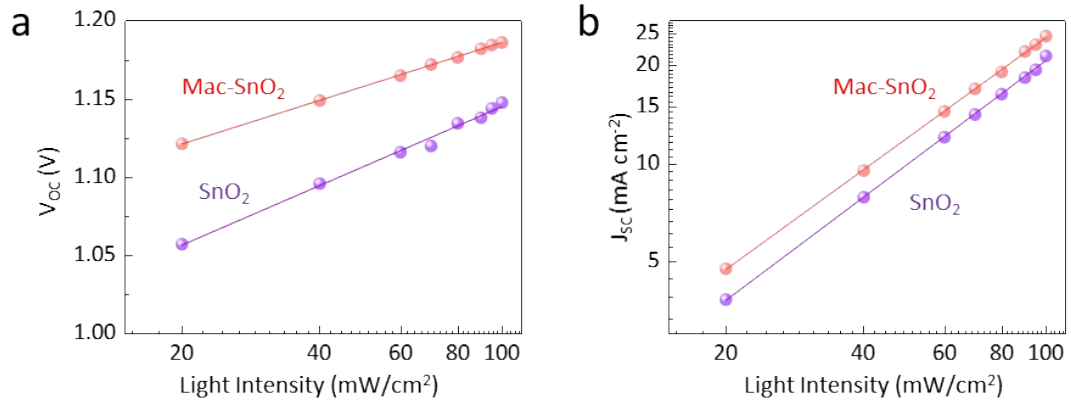

**Fig. S15.** (a) The dependence of  $V_{oc}$  on light intensity for SnO<sub>2</sub> and Mac-SnO<sub>2</sub> based devices. (b) The dependence of  $J_{sc}$  on light intensity for SnO<sub>2</sub> and Mac-SnO<sub>2</sub> based devices.

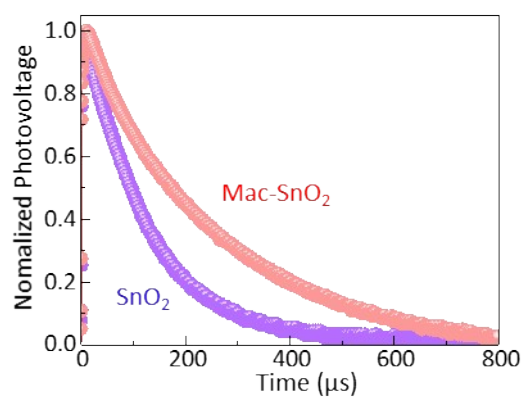

**Fig. S16.** TPV curves of SnO<sub>2</sub> and Mac-SnO<sub>2</sub> based devices.

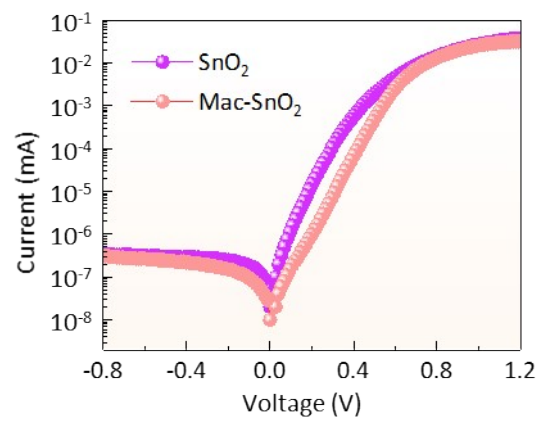

**Fig. S17.** Dark  $I$ - $V$  curves of the PSCs based on SnO<sub>2</sub> and Mac-SnO<sub>2</sub> ETL.

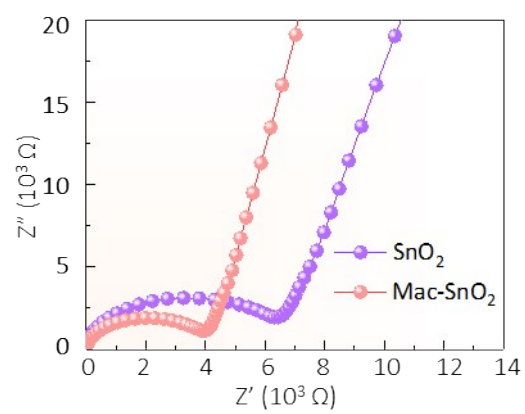

**Fig. S18.** Nyquist plots of the  $\text{SnO}_2$  and  $\text{Mac-SnO}_2$  based devices.

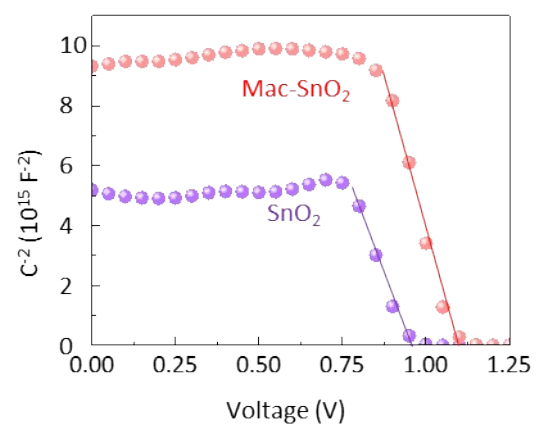

**Fig. S19.** Mott-Schottky plots of SnO<sub>2</sub> and Mac-SnO<sub>2</sub> based devices.

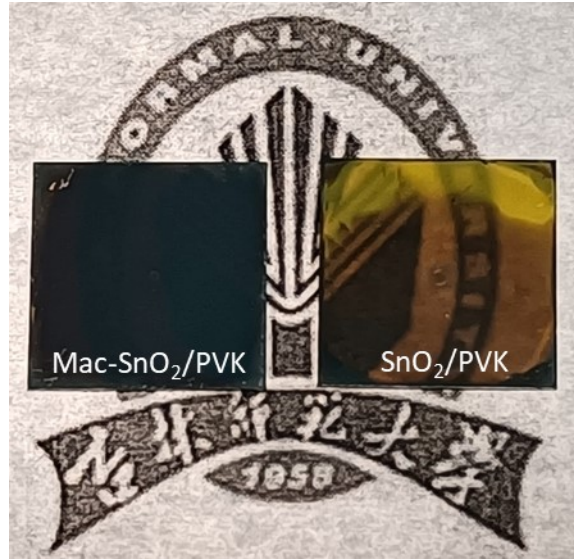

**Fig. S20.** Photograph of SnO<sub>2</sub>/perovskite and Mac-SnO<sub>2</sub>/perovskite exposed to air environment with 30%–40% humidity for 20 days.

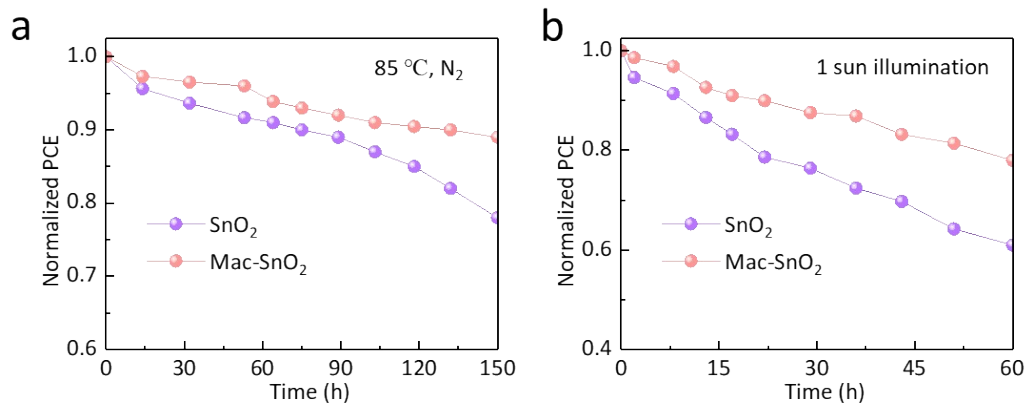

**Fig. S21.** Normalized *PCEs* of SnO<sub>2</sub> and Mac-SnO<sub>2</sub> based devices stored (a) at 85 °C in N<sub>2</sub> atmosphere and (b) under 1 sun illumination.



Table S1. Detail values of  $V_{oc}$ ,  $J_{sc}$ ,  $FF$  and  $PCE$  for Mac-SnO<sub>2</sub> based and SnO<sub>2</sub> based devices.

|                               | $V_{oc}$ (V) | $J_{sc}$ (mA cm <sup>-2</sup> ) | $FF$ (%) | $PCE$ (%) |
|-------------------------------|--------------|---------------------------------|----------|-----------|
| Mac-SnO <sub>2</sub> -Reverse | 1.16         | 24.96                           | 80.69    | 23.36     |
| Mac-SnO <sub>2</sub> -Forward | 1.15         | 24.49                           | 80.47    | 22.56     |
| SnO <sub>2</sub> -Reverse     | 1.12         | 24.25                           | 77.66    | 21.11     |
| SnO <sub>2</sub> -Forward     | 1.10         | 24.12                           | 74.29    | 19.75     |

Table S2. Photovoltaic parameters derived from the champion devices with different Mac-SnO<sub>2</sub> concentrations.

|            | $V_{oc}$ (V) | $J_{sc}$ (mA cm <sup>-2</sup> ) | $FF$ (%) | $PCE$ (%) |
|------------|--------------|---------------------------------|----------|-----------|
| 2.5 mg/mL  | 1.14         | 24.73                           | 79.86    | 22.58     |
| 5.0 mg/mL  | 1.14         | 25.32                           | 80.00    | 23.08     |
| 7.5 mg/mL  | 1.16         | 24.96                           | 80.69    | 23.36     |
| 10.0 mg/mL | 1.14         | 24.72                           | 79.38    | 22.44     |
| 12.5 mg/mL | 1.13         | 24.72                           | 78.05    | 21.81     |

Table S3. The output parameters of the SnO<sub>2</sub> based devices.

|    | $V_{oc}$ (V) | $J_{sc}$ (mA cm <sup>-2</sup> ) | $FF$ (%) | $PCE$ (%) |
|----|--------------|---------------------------------|----------|-----------|
| 1  | 1.09         | 23.93                           | 79.04    | 20.64     |
| 2  | 1.08         | 24.21                           | 77.66    | 20.29     |
| 3  | 1.09         | 22.71                           | 79.74    | 19.82     |
| 4  | 1.09         | 22.60                           | 78.27    | 19.32     |
| 5  | 1.08         | 22.65                           | 77.44    | 18.91     |
| 6  | 1.12         | 22.77                           | 79.09    | 20.08     |
| 7  | 1.11         | 23.20                           | 78.47    | 20.21     |
| 8  | 1.13         | 23.29                           | 77.84    | 20.53     |
| 9  | 1.12         | 23.68                           | 78.14    | 20.79     |
| 10 | 1.12         | 23.55                           | 77.17    | 20.33     |
| 11 | 1.13         | 23.01                           | 73.98    | 19.22     |
| 12 | 1.14         | 22.95                           | 79.51    | 20.95     |
| 13 | 1.12         | 24.25                           | 77.66    | 21.11     |
| 14 | 1.15         | 21.73                           | 79.44    | 19.85     |
| 15 | 1.15         | 23.00                           | 79.49    | 20.98     |
| 16 | 1.14         | 22.07                           | 76.30    | 19.16     |
| 17 | 1.16         | 23.37                           | 77.58    | 21.07     |
| 18 | 1.15         | 22.38                           | 80.05    | 20.51     |
| 19 | 1.13         | 24.56                           | 75.72    | 21.01     |
| 20 | 1.10         | 23.55                           | 78.32    | 20.35     |

Table S4. The output parameters of the Mac-SnO<sub>2</sub> based devices.

|    | $V_{oc}$ (V) | $J_{sc}$ (mA cm <sup>-2</sup> ) | $FF$ (%) | $PCE$ (%) |
|----|--------------|---------------------------------|----------|-----------|
| 1  | 1.13         | 24.10                           | 78.20    | 21.33     |
| 2  | 1.16         | 22.44                           | 80.73    | 21.06     |
| 3  | 1.09         | 23.91                           | 82.08    | 21.34     |
| 4  | 1.16         | 24.96                           | 80.69    | 23.36     |
| 5  | 1.12         | 24.80                           | 81.32    | 22.66     |
| 6  | 1.17         | 24.05                           | 76.30    | 21.53     |
| 7  | 1.14         | 24.81                           | 75.05    | 21.25     |
| 8  | 1.16         | 24.10                           | 77.30    | 21.65     |
| 9  | 1.14         | 25.31                           | 79.73    | 23.01     |
| 10 | 1.15         | 24.50                           | 79.78    | 22.55     |
| 11 | 1.15         | 24.64                           | 79.01    | 22.34     |
| 12 | 1.15         | 22.24                           | 80.77    | 21.56     |
| 13 | 1.12         | 24.06                           | 80.12    | 21.65     |
| 14 | 1.15         | 23.37                           | 80.33    | 21.52     |
| 15 | 1.14         | 25.33                           | 79.98    | 23.05     |
| 16 | 1.13         | 24.40                           | 78.86    | 21.83     |
| 17 | 1.17         | 23.24                           | 80.08    | 21.68     |
| 18 | 1.12         | 24.66                           | 80.63    | 22.25     |
| 19 | 1.16         | 23.37                           | 79.37    | 21.56     |
| 20 | 1.13         | 24.24                           | 77.99    | 21.43     |
